# Supplementary material for: An electrochemical process to prepare and recycle biobased ionic liquids
Source: Royal Society of Chemistry journal article supplement (doi:10.1039/c9gc02055a), 2019-01-01
Supplement: c9gc02055a1.pdf [file c9gc02055a1.pdf]

*Electronic Supplementary Information*

**Electrochemical process to prepare and to recycle biobased ionic liquids**

Antoine Fournier, Jihane Bousfiha, Guillaume de Robillard,

Charles H. Devillers\* and Jacques Andrieu\*

Institut de Chimie Moléculaire de l'Université de Bourgogne, UMR CNRS 6302, Université de Bourgogne Franche-Comté, 9 av. Alain Savary, 21078 DIJON, France.

E-mail: [jacques.andrieu@u-bourgogne.fr](mailto:jacques.andrieu@u-bourgogne.fr) and [charles.devillers@u-bourgogne.fr](mailto:charles.devillers@u-bourgogne.fr)

**Table of contents**

|                                                                                                                                      |    |
|--------------------------------------------------------------------------------------------------------------------------------------|----|
| <sup>1</sup> H- and <sup>13</sup> C-NMR spectra for [iBu <sub>2</sub> IM](BF <sub>4</sub> )                                          | 2  |
| <sup>1</sup> H - and <sup>13</sup> C-NMR spectra for [iBu <sub>2</sub> IM](PF <sub>6</sub> )                                         | 3  |
| <sup>1</sup> H - and <sup>13</sup> C-NMR spectra for [iBu <sub>2</sub> IM](HSO <sub>4</sub> )                                        | 4  |
| <sup>1</sup> H - and <sup>13</sup> C-NMR spectra for [iBu <sub>2</sub> IM](NTf <sub>2</sub> )                                        | 5  |
| Cyclic voltammograms of [iBu <sub>2</sub> IM](AcO)                                                                                   | 6  |
| <sup>1</sup> H- and <sup>13</sup> C-NMR spectra for [iBu <sub>2</sub> IM](AcO)<br>obtained by electrochemical and chemical syntheses | 7  |
| <sup>1</sup> H- and <sup>13</sup> C-NMR spectra of crude evaporated solution after electrolysis of [iBu <sub>2</sub> IM](AcO)        | 9  |
| <sup>1</sup> H- and <sup>13</sup> C-NMR spectra for [iBu <sub>2</sub> IM](HCO <sub>2</sub> )                                         | 10 |
| Calculation of environmental impacts and Calculation of energy consumption for<br>Ionic liquids recycling by direct distillation     | 11 |
| Determination of equilibrium constants for protonation reactions with acetic/formic acids                                            | 12 |

$^1\text{H}$ - and  $^{13}\text{C}$ -NMR spectra for  $[\text{iBu}_2\text{IM}](\text{BF}_4)$  (recording conditions, see manuscript)

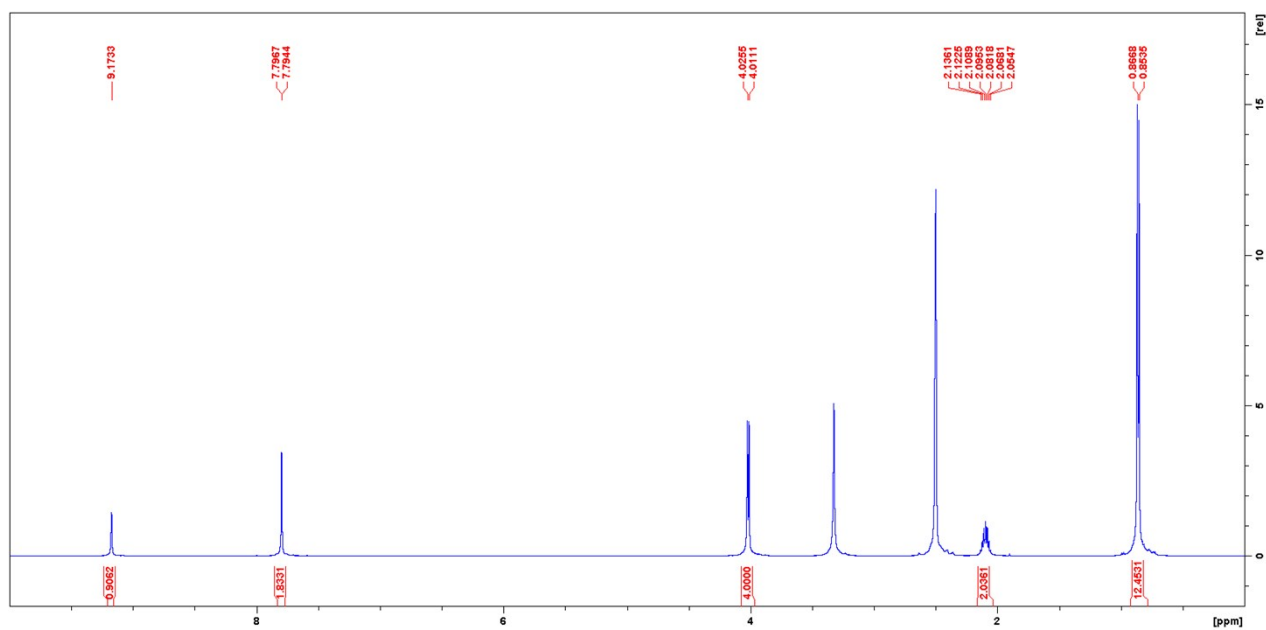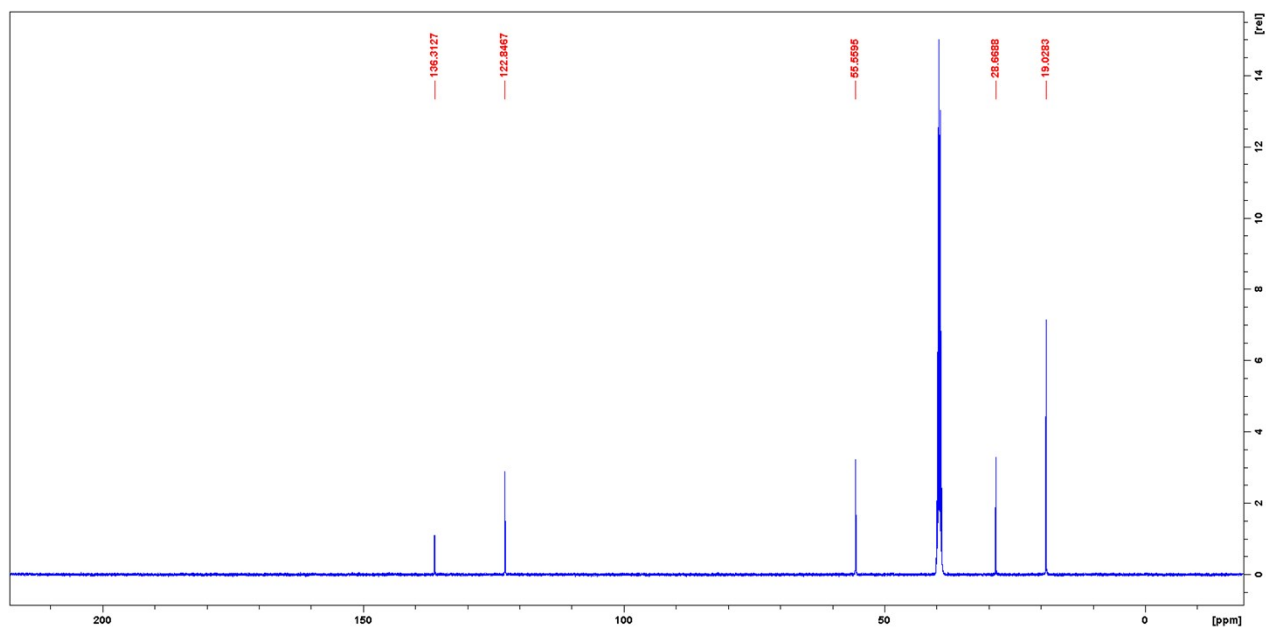

$^1\text{H}$ - and  $^{13}\text{C}$ -NMR spectra for  $[\text{iBu}_2\text{IM}](\text{PF}_6)$  (recording conditions, see manuscript)

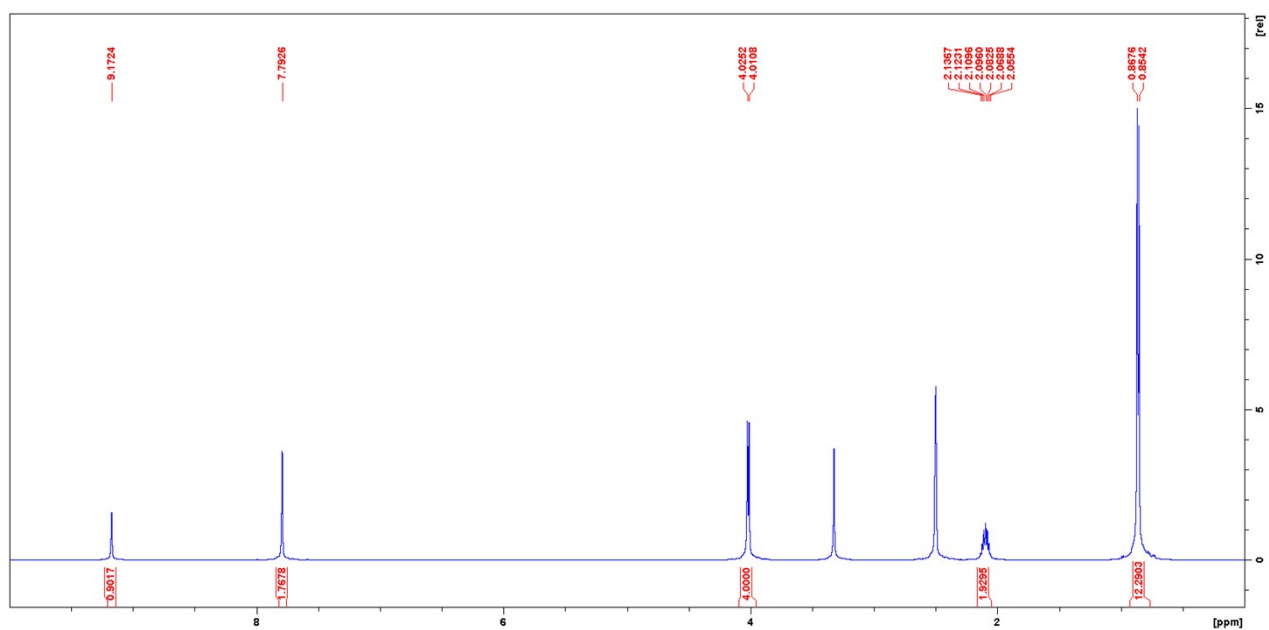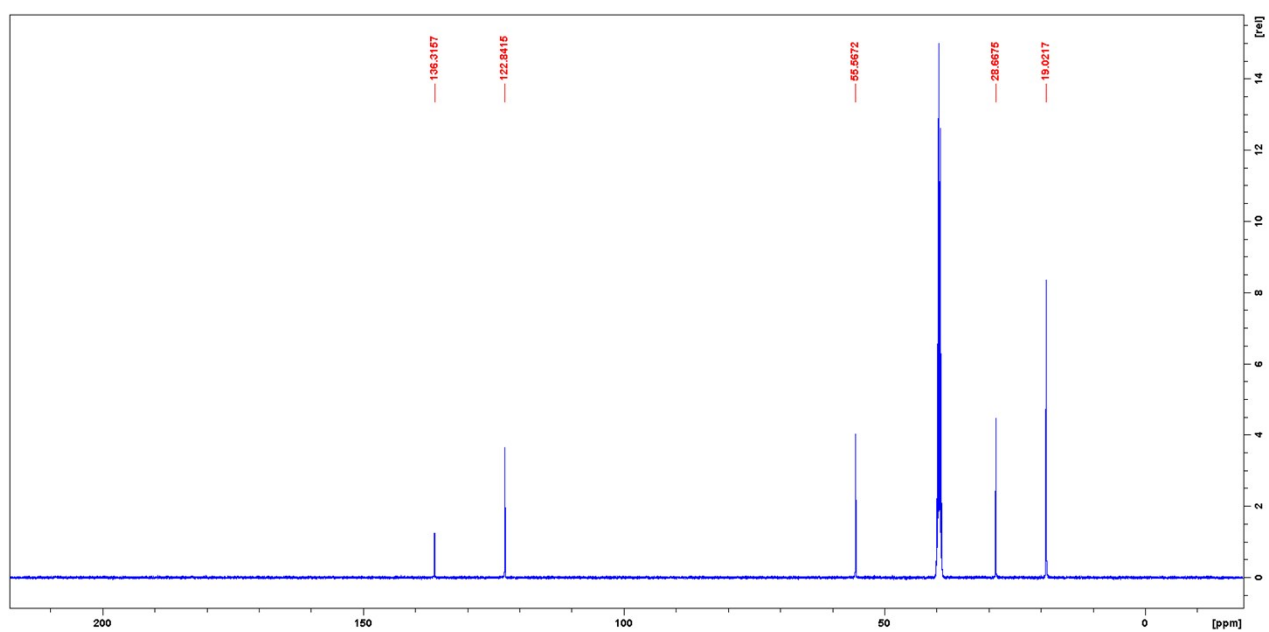

$^1\text{H}$ - and  $^{13}\text{C}$ -NMR spectra for  $[\text{iBu}_2\text{IM}](\text{HSO}_4)$  (recording conditions, see manuscript)

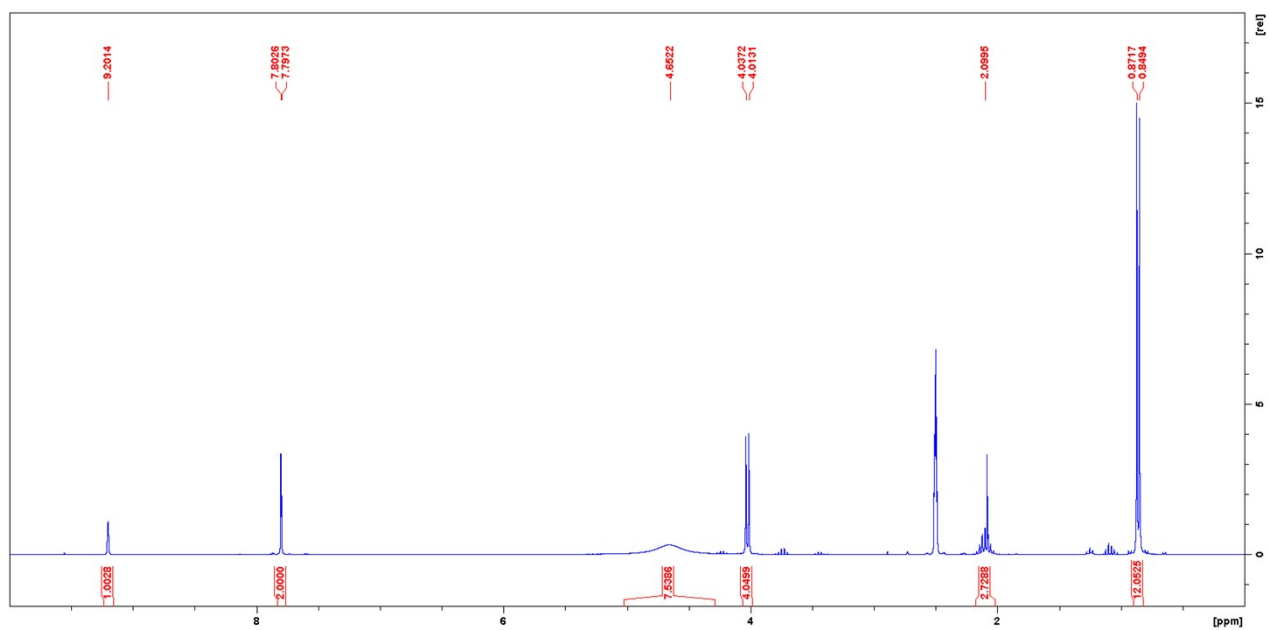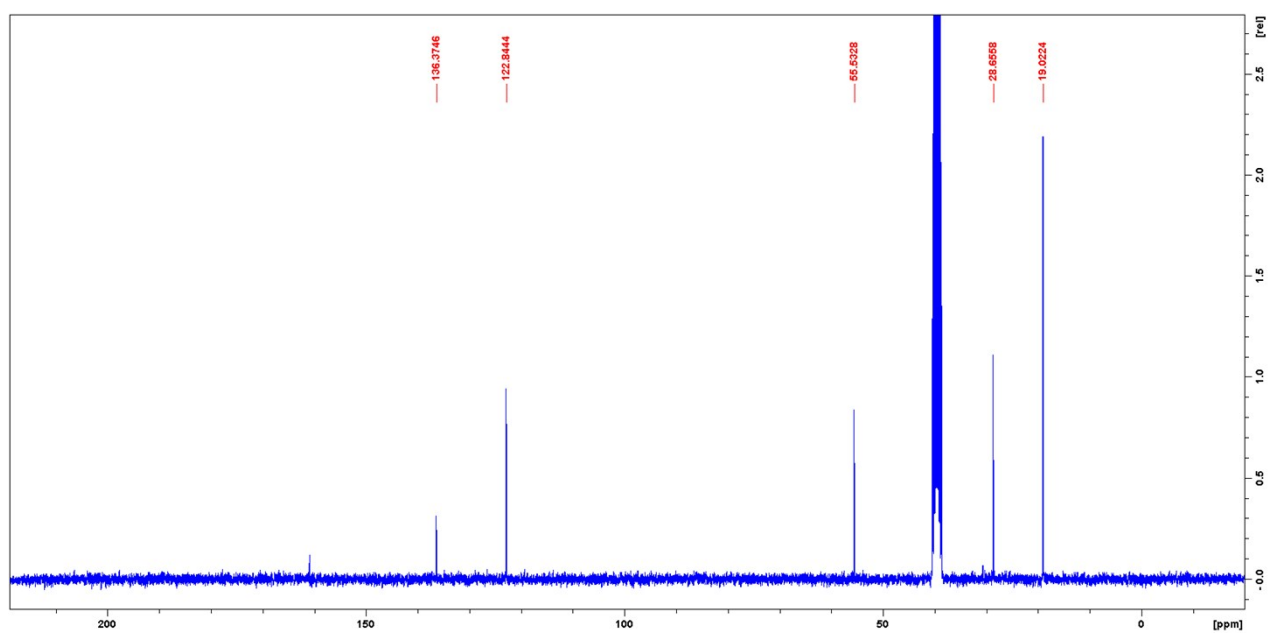

<sup>1</sup>H- and <sup>13</sup>C-NMR spectra for [iBu<sub>2</sub>IM](NTf<sub>2</sub>) (recording conditions, see manuscript)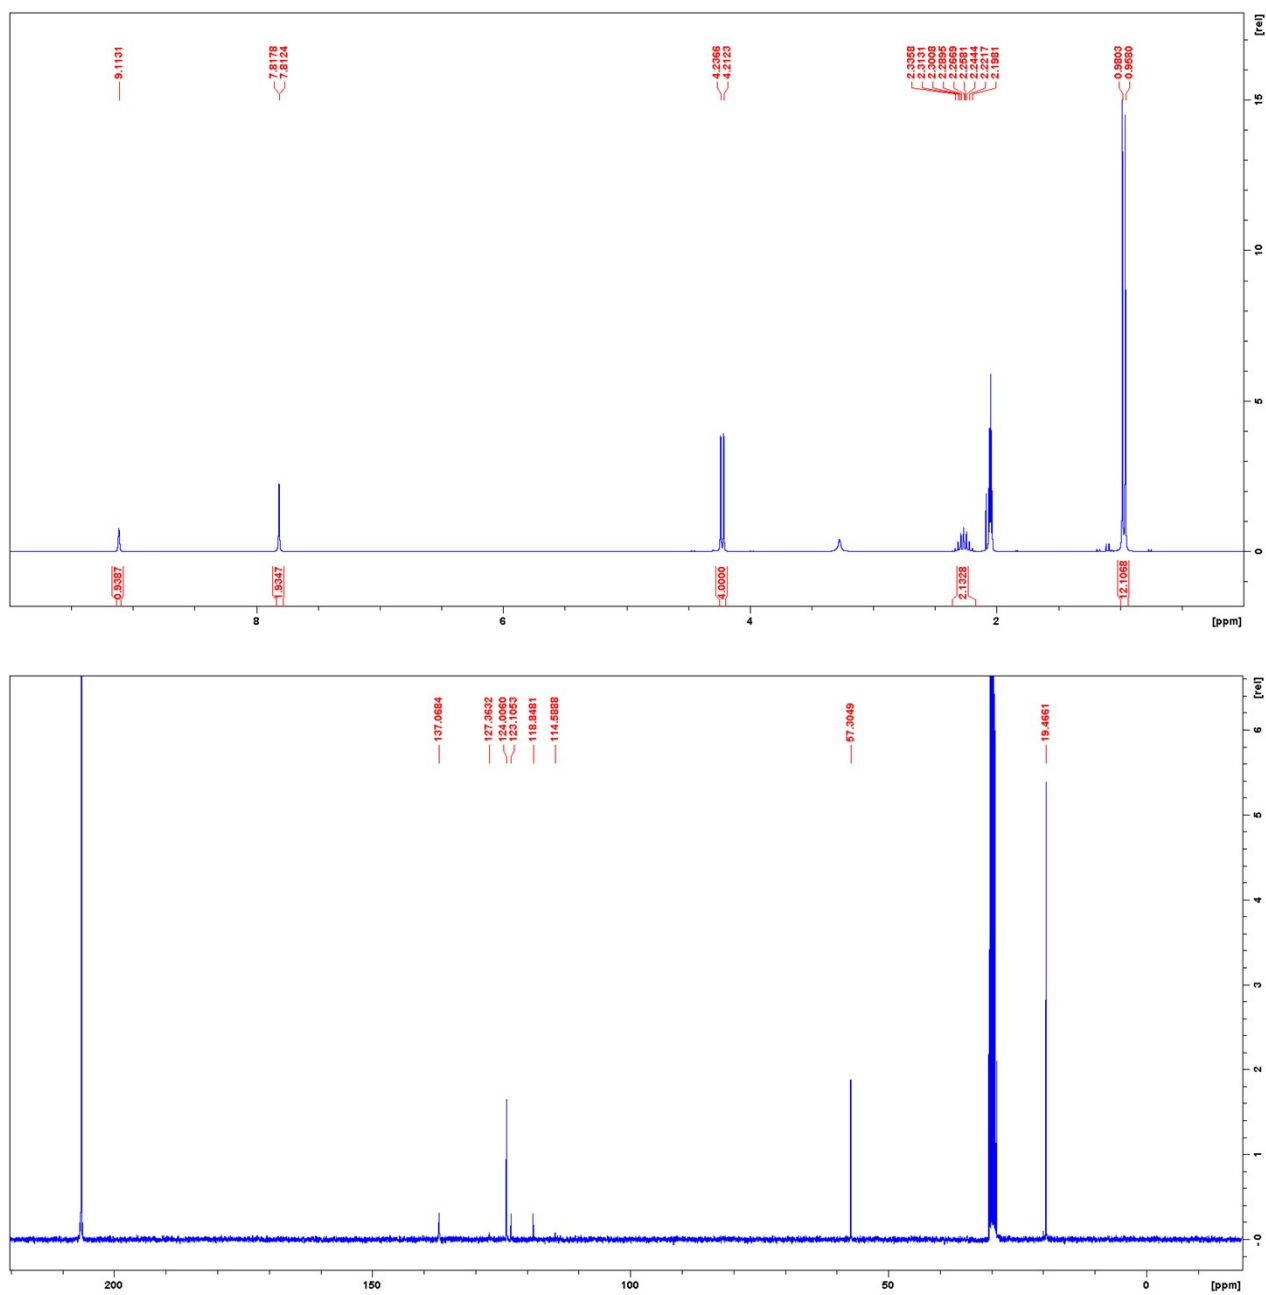

Figure 1. Cyclic voltammograms of [iBu<sub>2</sub>IM](AcO) in CH<sub>3</sub>CN at  $C = 2.1 \times 10^{-2}$  M (black solid curve) and CH<sub>3</sub>CN 0.1 M tetra-*n*-butylammonium hexafluorophosphate (dotted red curve). (WE: carbon 3 mm, reference electrode: SCE, CE: glassy carbon beaker,  $\nu = 100$  mV s<sup>-1</sup> at RT).

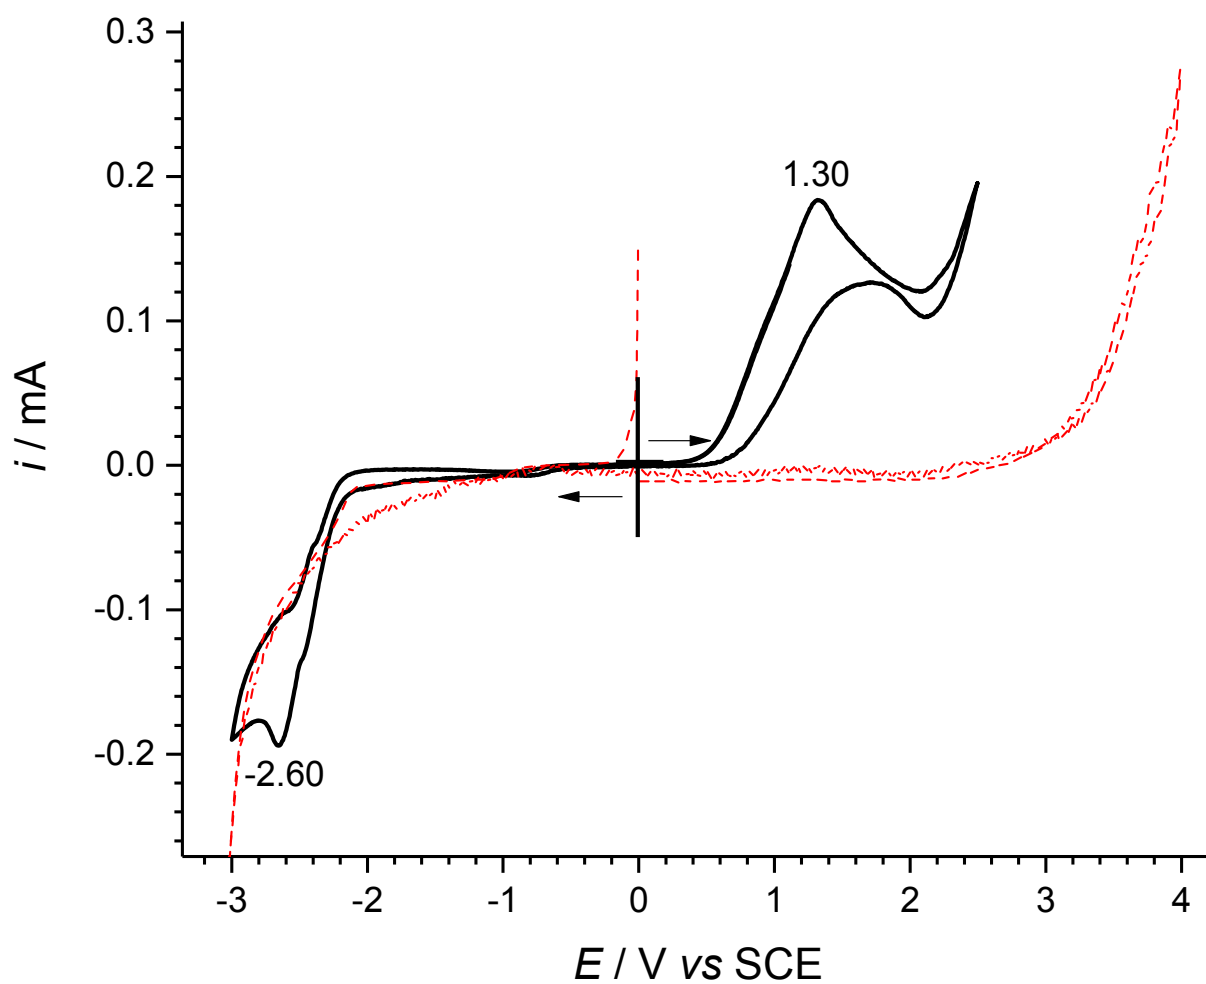

**$^1\text{H}$ - and  $^{13}\text{C}$ -NMR spectra** for [iBu<sub>2</sub>IM](AcO) obtained by electrochemical synthesis (recording conditions, see manuscript)

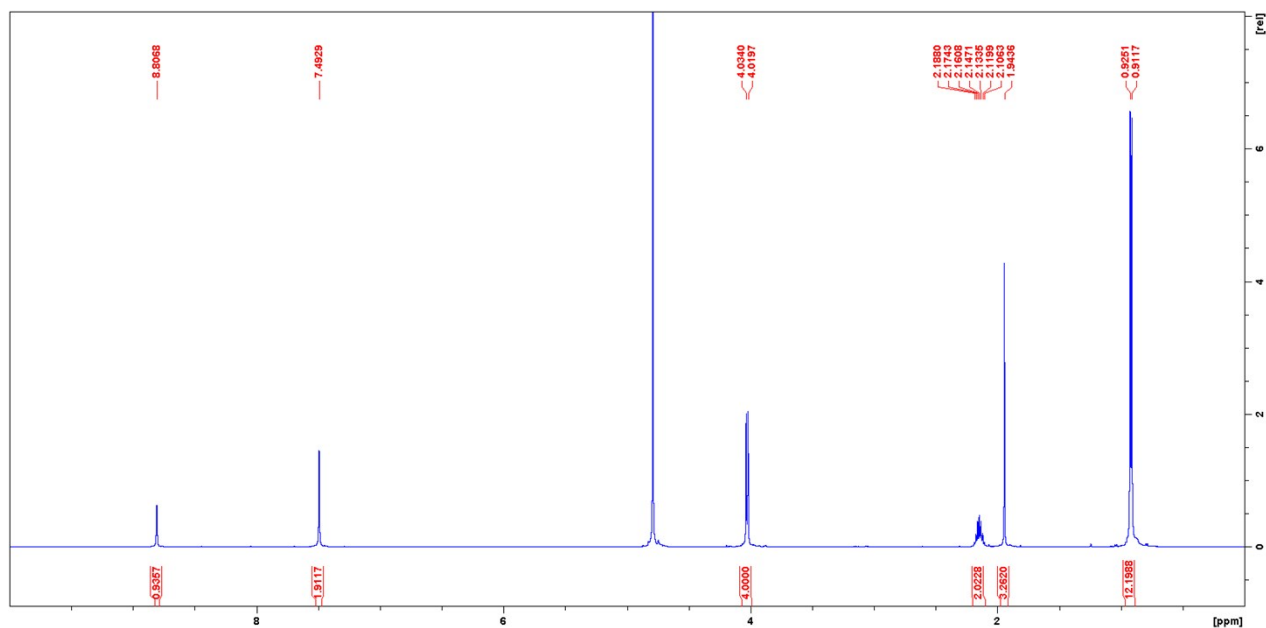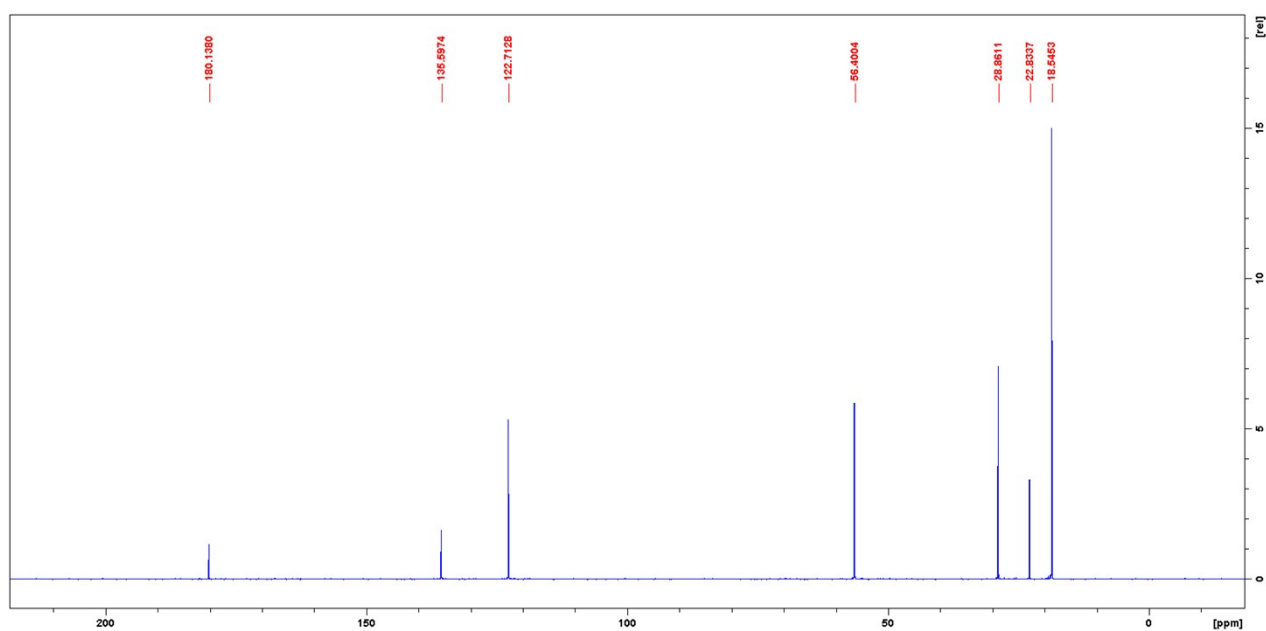

**$^1\text{H}$ - and  $^{13}\text{C}$ -NMR spectra** for  $[\text{iBu}_2\text{IM}](\text{AcO})$  obtained by chemical synthesis (recording conditions, see manuscript)

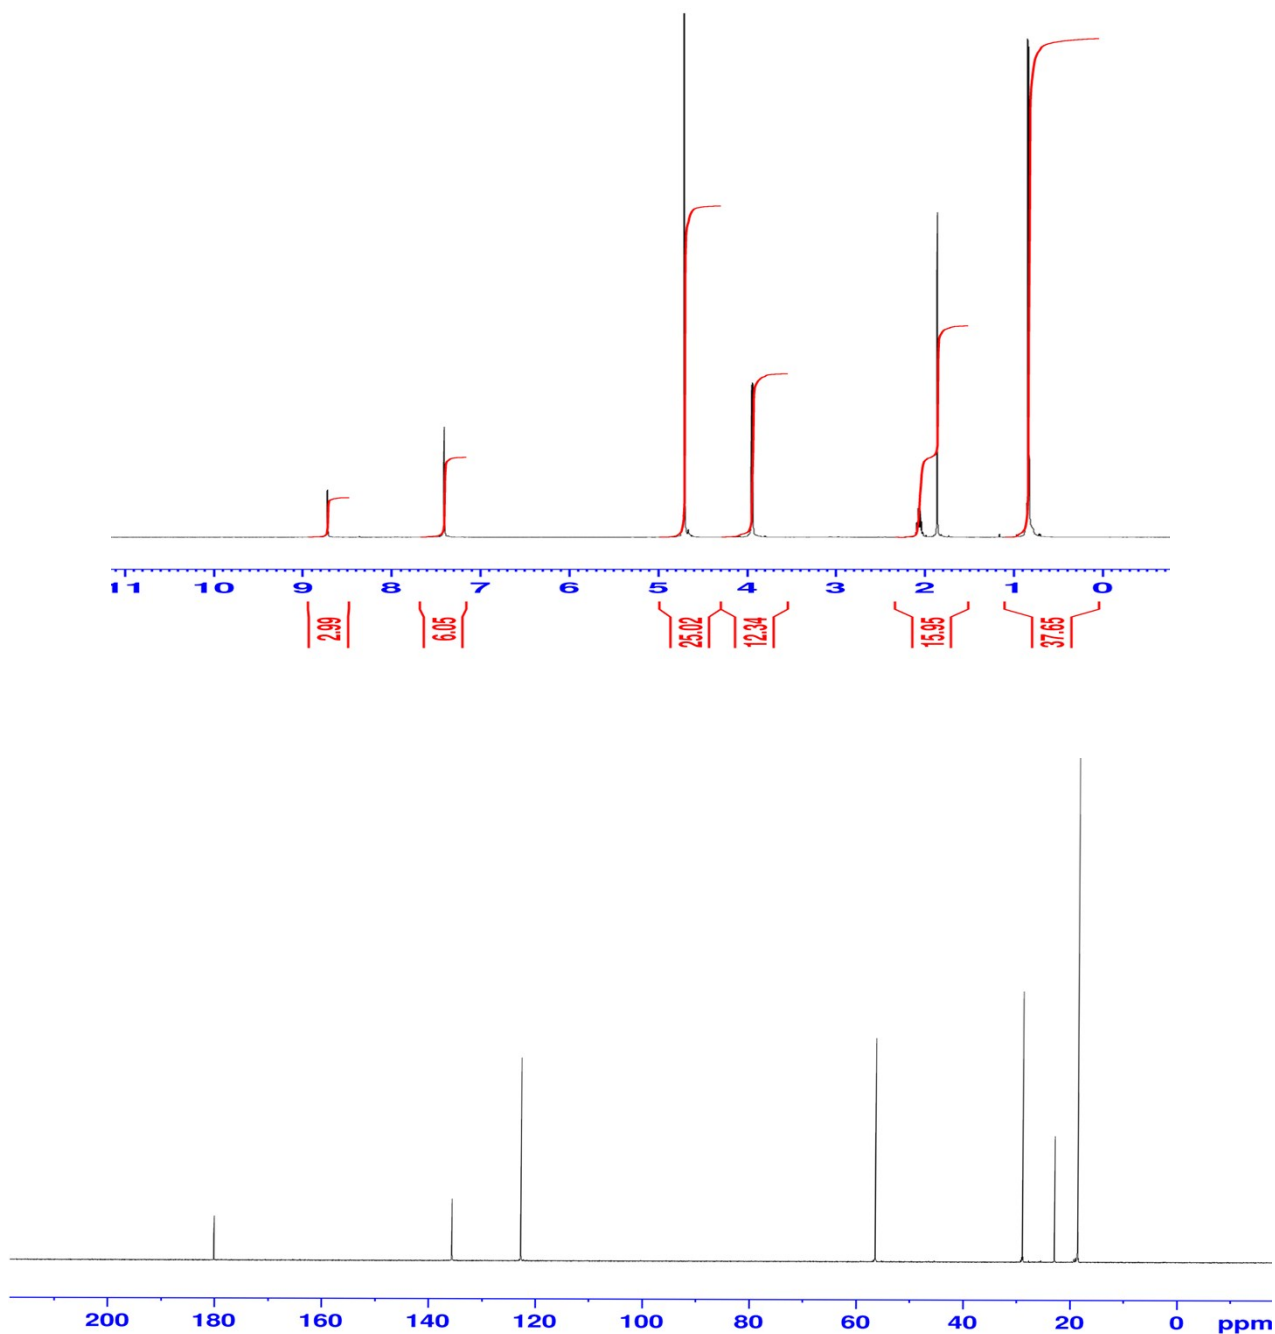

$^1\text{H}$ - and  $^{13}\text{C}$ -NMR spectra of crude evaporated solution after electrolysis of  $[\text{iBu}_2\text{IM}](\text{AcO})$

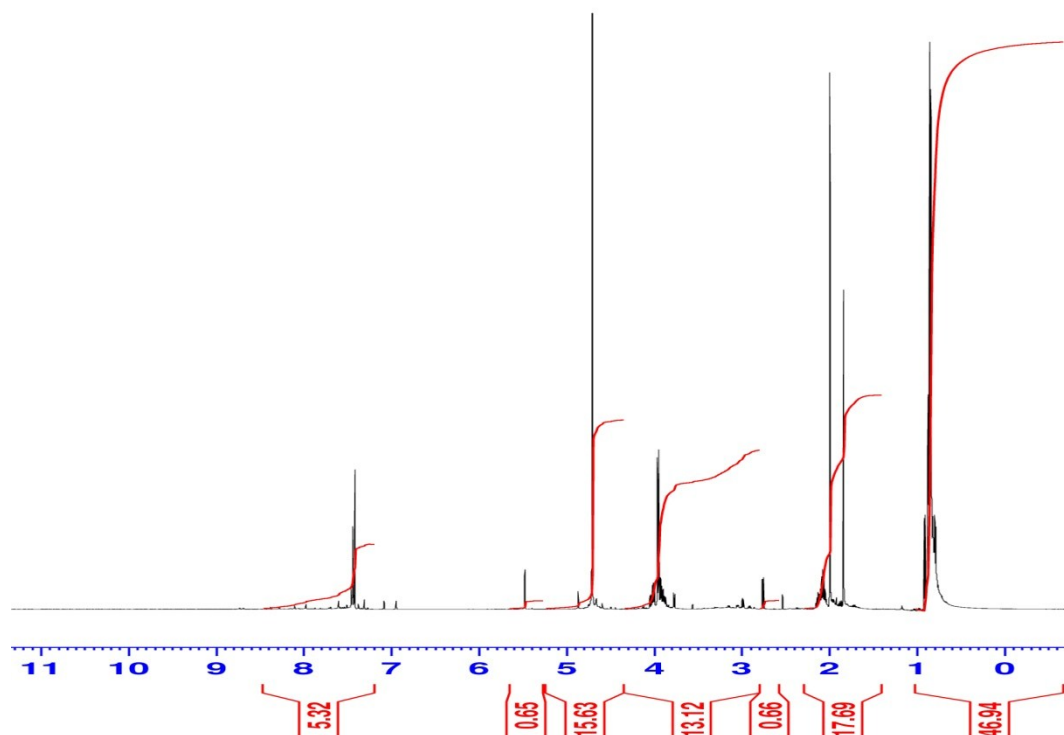

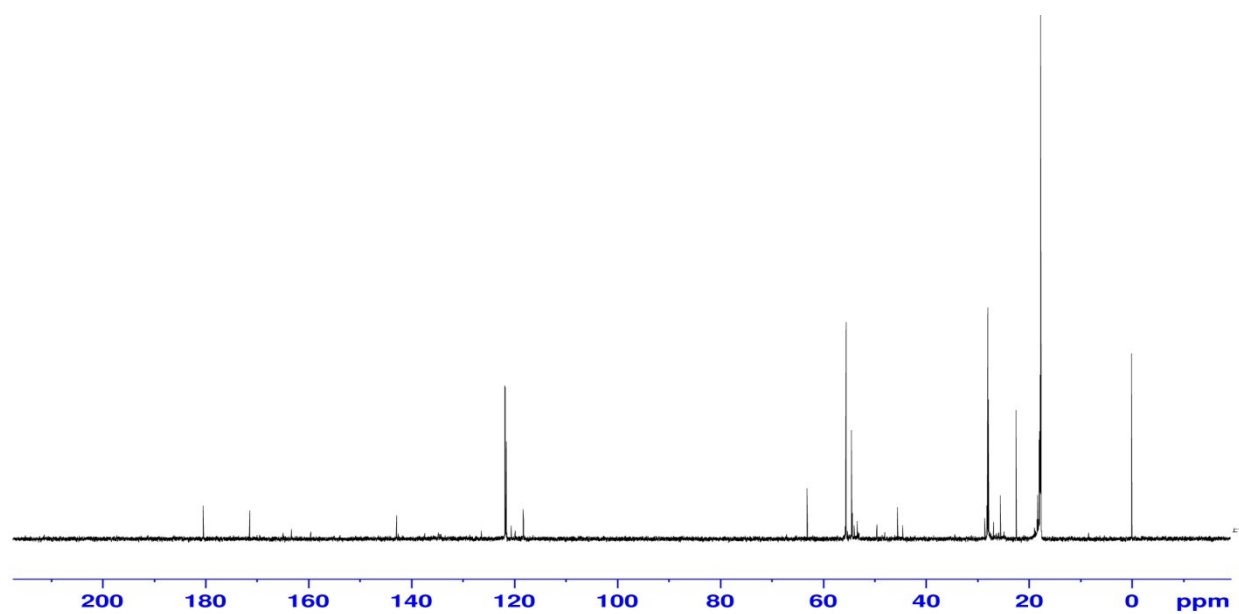

$^1\text{H}$ - and  $^{13}\text{C}$ -NMR spectra for  $[\text{iBu}_2\text{IM}](\text{HCO}_2)$  (recording conditions, see manuscript)

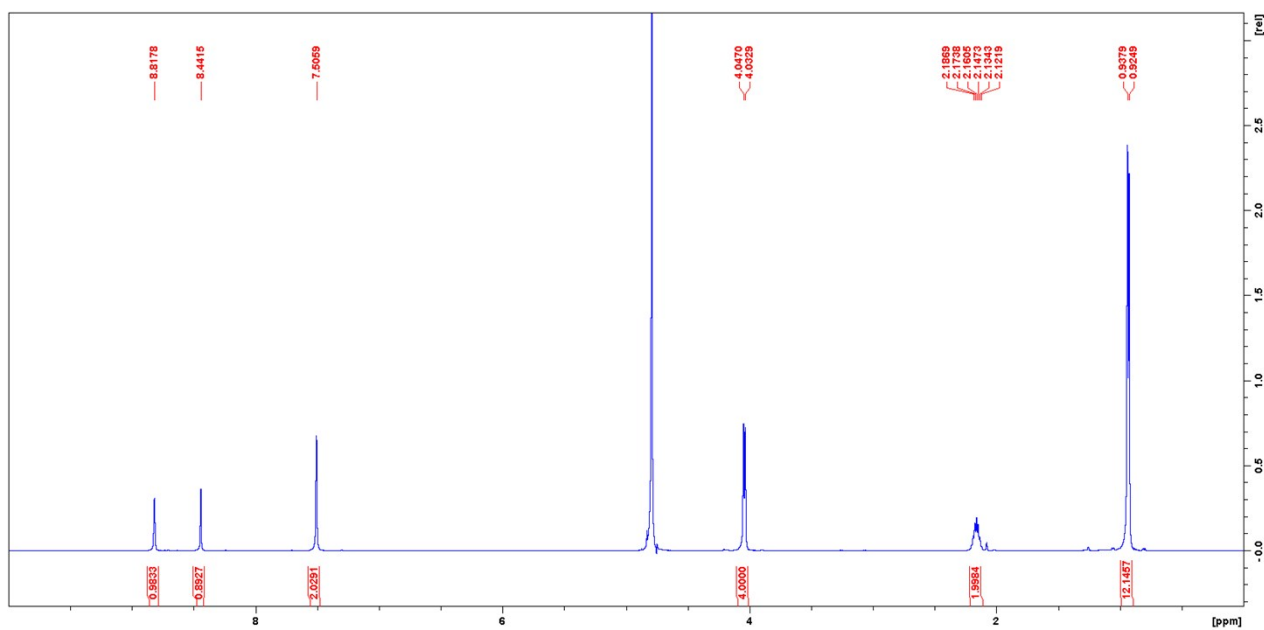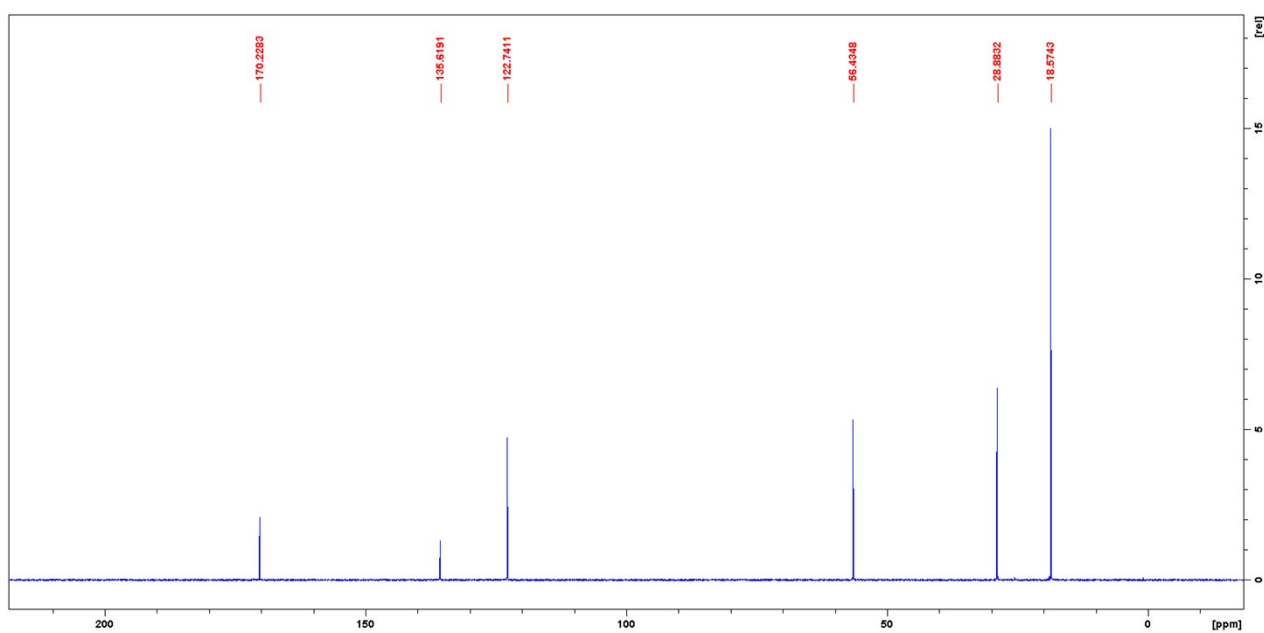

### Calculation of environmental impacts

The toxicity of each ionic liquid recycling process were calculated as follow: the human toxicity data of the compound used in the process were found on the ReCiPe list.<sup>33</sup> The unit of these values is the equivalent in kilogram of 1,4-dichlorobenzene (1,4-DB), which serves as reference unit for the toxicity. These values were then multiplied by the mass of the compound used in the process and added to the others compounds of the process (Table 2).

| Recycling Technologies RT:                                             | <b>1</b>      |               | <b>2</b>        | <b>3</b>             | <b>4</b> | <b>5</b>     |         |
|------------------------------------------------------------------------|---------------|---------------|-----------------|----------------------|----------|--------------|---------|
| Compounds used                                                         | Diethyl ether | Ethyl acetate | CO <sub>2</sub> | <i>tert</i> -butanol | -        | Acetonitrile | Acetone |
| eq. kg 1,4-DB (x 10 <sup>-3</sup> )                                    | 12            | 12            | 0               | 560                  | -        | 48           | 8.7     |
| Mass used in the process (x 10 <sup>-3</sup> kg)                       | 33.3          | 8.6           | 4.6             | 0.82                 | -        | 150          | 24      |
| eq. kg 1,4-DB for the obtaining of 10 mmol of IL (x 10 <sup>-4</sup> ) | 4.0           | 1.0           | 0               | 4.6                  | -        | 72           | 2.1     |
| Total for the process (x10 <sup>-4</sup> eq. kg1,4-DB)                 | 5.0           |               | 0               | 4.6                  | 0        | 74           |         |

**Table 2.** Quantification of toxicity impacts of solvents used in recycling technologies

### Calculation of energy consumption for ionic liquids recycling by direct distillation

To evaluate the energy consumption of the processes described in the literature, we measured the energy consumption of similar equipment with the Voltcraft Energy Monitor 3000. To model a Kugelrohr apparatus, we used a Buchi B-585 heating to 300°C and a vacuum pump Edwards RV3. After several minutes of equilibrium, the electric power was measured at 488 W, which was then used for the energy consumption of processes (by multiplying this value by the time).

## Determination of equilibrium constants for protonation reactions with acetic/formic acids

With acetic acid:

|                                                                                                                                                                       |                                                                                                                                                                                                            |
|-----------------------------------------------------------------------------------------------------------------------------------------------------------------------|------------------------------------------------------------------------------------------------------------------------------------------------------------------------------------------------------------|
| $\text{CH}_3\text{COOH} + \text{HCO}_3^- \xrightarrow[-\text{H}_2\text{O}]{K_R = 1.09 \times 10^3} \text{CH}_3\text{COO}^- + \text{CO}_2(\text{g})$                   | $K_R = \frac{[\text{CH}_3\text{COO}^-] \cdot p\text{CO}_2}{[\text{CH}_3\text{COOH}] \cdot [\text{HCO}_3^-]}$                                                                                               |
| $\text{CH}_3\text{COOH} \xrightleftharpoons{K_{a1} = 1.74 \times 10^{-5}} \text{CH}_3\text{COO}^- + \text{H}^+$                                                       | =                                                                                                                                                                                                          |
| $\text{CO}_2(\text{aq}) \xrightleftharpoons{1/K_H = 1/29.41} \text{CO}_2(\text{g})$                                                                                   | $\frac{[\text{CH}_3\text{COO}^-] \cdot [\text{H}^+] \cdot p\text{CO}_2 \cdot [\text{CO}_2(\text{aq})]}{[\text{CH}_3\text{COOH}] \cdot [\text{H}^+] \cdot [\text{HCO}_3^-] \cdot [\text{CO}_2(\text{aq})]}$ |
| $\text{HCO}_3^- + \text{H}^+ \xrightleftharpoons[= 1/10^{-6.35}]{1/K_{a1}(\text{H}_2\text{CO}_3)} \text{CO}_2(\text{aq}) \text{ or } \text{CO}_2, \text{H}_2\text{O}$ | =                                                                                                                                                                                                          |
|                                                                                                                                                                       | $\frac{[\text{CH}_3\text{COO}^-] \cdot [\text{H}^+] \cdot p\text{CO}_2 \cdot [\text{CO}_2(\text{aq})]}{[\text{CH}_3\text{COOH}] \cdot [\text{CO}_2(\text{aq})] \cdot [\text{HCO}_3^-] \cdot [\text{H}^+]}$ |
|                                                                                                                                                                       | $= \frac{K_a(\text{CH}_3\text{COOH}) \times K_H}{K_{a1}(\text{CO}_2)}$                                                                                                                                     |
|                                                                                                                                                                       | $= \frac{10^{-4.76} \times 29.41}{10^{-6.35}} \Rightarrow K_R = 1.15 \times 10^3$                                                                                                                          |

With formic acid:

|                                                                                                                                                                       |                                                                                                                                                                                        |
|-----------------------------------------------------------------------------------------------------------------------------------------------------------------------|----------------------------------------------------------------------------------------------------------------------------------------------------------------------------------------|
| $\text{HCOOH} + \text{HCO}_3^- \xrightarrow[-\text{H}_2\text{O}]{K_R = 1.17 \times 10^4} \text{HCOO}^- + \text{CO}_2(\text{g})$                                       | $K_R = \frac{[\text{HCOO}^-] \cdot p\text{CO}_2}{[\text{HCOOH}] \cdot [\text{HCO}_3^-]}$                                                                                               |
| $\text{HCOOH} \xrightleftharpoons{K_{a1} = 1.78 \times 10^{-4}} \text{HCOO}^- + \text{H}^+$                                                                           | =                                                                                                                                                                                      |
| $\text{CO}_2(\text{aq}) \xrightleftharpoons{1/K_H = 1/29.41} \text{CO}_2(\text{g})$                                                                                   | $\frac{[\text{HCOO}^-] \cdot [\text{H}^+] \cdot p\text{CO}_2 \cdot [\text{CO}_2(\text{aq})]}{[\text{HCOOH}] \cdot [\text{H}^+] \cdot [\text{HCO}_3^-] \cdot [\text{CO}_2(\text{aq})]}$ |
| $\text{HCO}_3^- + \text{H}^+ \xrightleftharpoons[= 1/10^{-6.35}]{1/K_{a1}(\text{H}_2\text{CO}_3)} \text{CO}_2(\text{aq}) \text{ or } \text{CO}_2, \text{H}_2\text{O}$ | =                                                                                                                                                                                      |
|                                                                                                                                                                       | $\frac{[\text{HCOO}^-] \cdot [\text{H}^+] \cdot p\text{CO}_2 \cdot [\text{CO}_2(\text{aq})]}{[\text{HCOOH}] \cdot [\text{CO}_2(\text{aq})] \cdot [\text{HCO}_3^-] \cdot [\text{H}^+]}$ |

|  |                                                                                                                          |
|--|--------------------------------------------------------------------------------------------------------------------------|
|  | $\frac{Ka(HCOOH) \times KH}{Ka1(CO2)}$ $= \frac{10^{-3.75} \times 29.41}{10^{-6.35}} \Rightarrow K_R = 1.17 \times 10^4$ |
|--|--------------------------------------------------------------------------------------------------------------------------|
